# Supplementary material for: Death of new microRNA genes in Drosophila via gradual loss of fitness advantages
Source: HighWire-hosted journal article supplement (doi:10.1101/gr.233809.117), 2018-07-26
Supplement: Supplemental_Fig.S1.pdf [file Supplemental_Fig.S1.pdf]

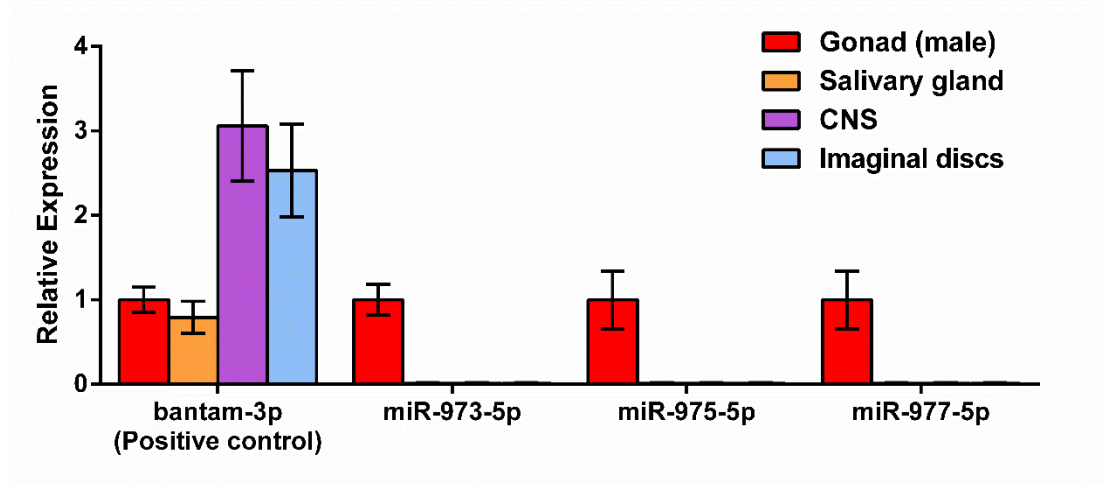

**Fig.S1. Relative expression of *de novo* miRNAs in various male larval tissues.**

Compared to the widely expressed miRNA, *bantam* (positive control); *mir-973*, *mir-975* and *mir-977* have testis-specific expression patterns in various male larval tissues.
