# Supplementary material for: Death of new microRNA genes in Drosophila via gradual loss of fitness advantages
Source: HighWire-hosted journal article supplement (doi:10.1101/gr.233809.117), 2018-07-26
Supplement: Supplemental_Fig.S3.pdf [file Supplemental_Fig.S3.pdf]

**Male fertility assay:**

|             |                                                                                           |   |   |          |                                                                               |   |   |   |
|-------------|-------------------------------------------------------------------------------------------|---|---|----------|-------------------------------------------------------------------------------|---|---|---|
| <b>F0 ♀</b> | <b>Reference female (<i>w<sup>1118</sup></i>)</b><br><i>w<sup>1118</sup>/FM7C;+/+;+/+</i> |   |   | <b>♂</b> | <b>Experimental male</b><br><i>miRNA<sup>-</sup>,w<sup>1118</sup>;+/+;+/+</i> |   |   |   |
|             | <b>X</b>                                                                                  |   |   |          |                                                                               |   |   |   |
|             | <b>↓</b>                                                                                  |   |   |          |                                                                               |   |   |   |
| <b>F1</b>   | Days                                                                                      | 1 | 2 | 3        | 4                                                                             | 5 | 6 | 7 |
|             | No. of eggs ( <b>x</b> )                                                                  | ✓ | ✓ | ✓        |                                                                               | ✓ |   | ✓ |
|             | No. of 1 <sup>st</sup> larvae ( <b>y</b> )                                                | ✓ | ✓ | ✓        |                                                                               | ✓ |   | ✓ |

Male fertility in days 1-2 :  $y_1 + y_2$  (N~12)

Male fertility in days 3-7 :  $y_3 + y_5 + y_7$  (N~12)

**Fig. S3. Experimental procedure for the male fertility assays.**

Similar crosses are set up for miRNA KO and control lines. For convenience, we use the miRNA KO flies to represent the experimental flies in the cross schemes.
