# Supplementary material for: Death of new microRNA genes in Drosophila via gradual loss of fitness advantages
Source: HighWire-hosted journal article supplement (doi:10.1101/gr.233809.117), 2018-07-26
Supplement: Supplemental_Fig.S5.pdf [file Supplemental_Fig.S5.pdf]

## A Sperm competition: Defense assay

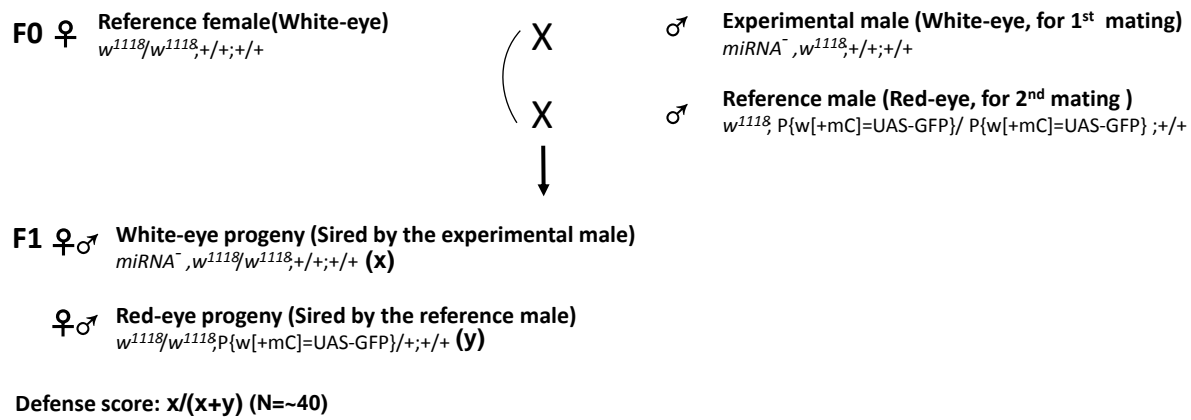

## B Sperm competition: Offense assay

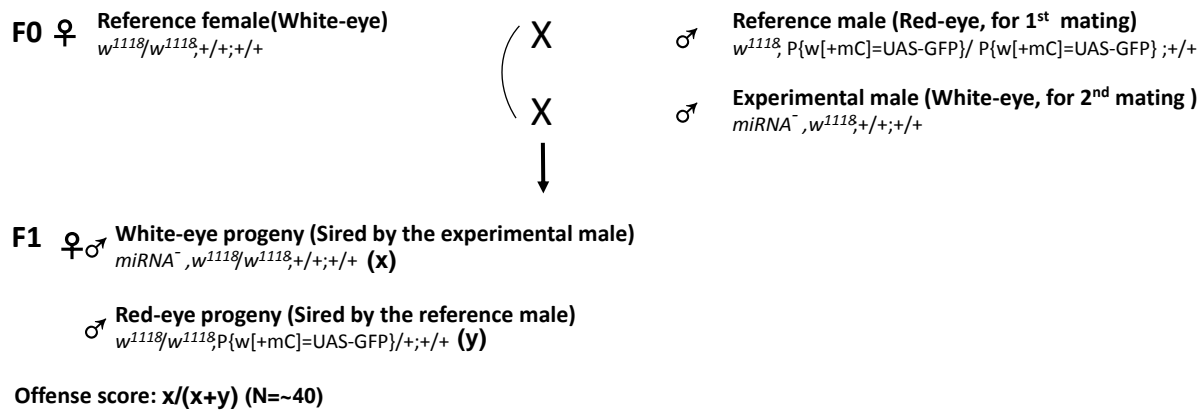

**Fig. S5. Experimental procedure for the sperm competition assays.**

Similar crosses are set up for miRNA KO and control lines. For convenience, we use the miRNA KO flies to represent the experimental flies in the cross schemes.

(A) Experimental procedures for the defense assays.

(B) Experimental procedures for the offense assays.
