# Supplementary material for: Death of new microRNA genes in Drosophila via gradual loss of fitness advantages
Source: HighWire-hosted journal article supplement (doi:10.1101/gr.233809.117), 2018-07-26
Supplement: Supplemental_Fig.S6.pdf [file Supplemental_Fig.S6.pdf]

## A Mating success and males ability to repress female remating:

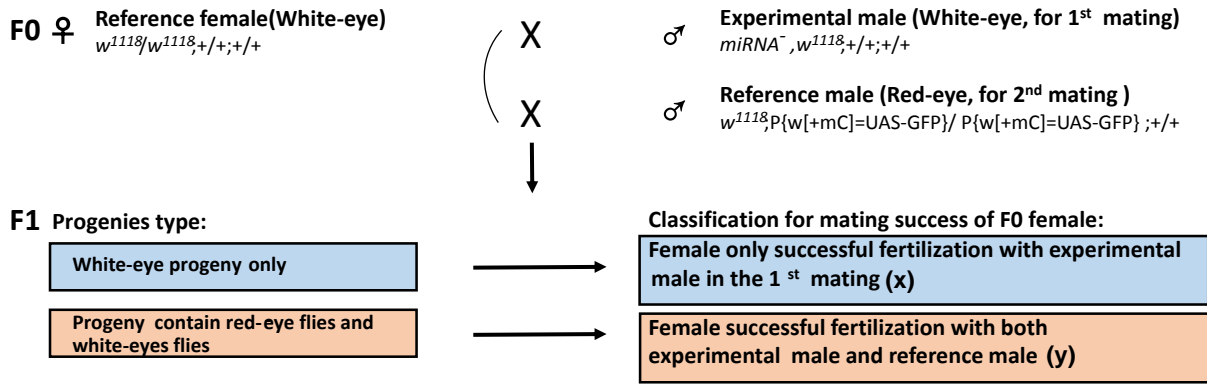

Mating success of male:  $(x+y)/\text{No. of replicates}(\sim 40)$

Female receptivity:  $y/(x+y)$

## B Male viability and meiotic drive :

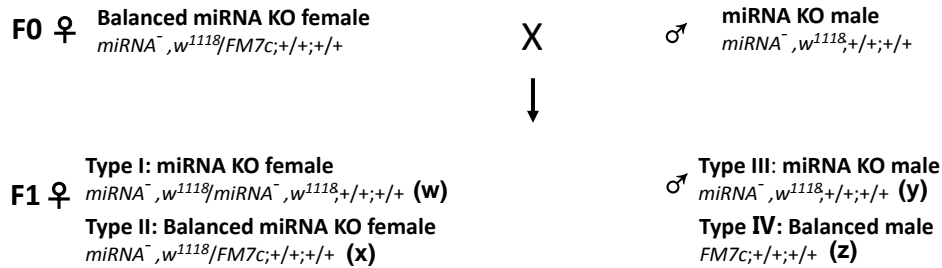

Male viability:  $y/z$  (N=12)

Distortion in sex chromosome transmission:  $x/z$  (N=12)

Female viability (additional control):  $w/x$  (N=12)

**Fig. S6. Experimental procedure for other male fitness component assays.**

Similar crosses are set up for miRNA KO and control lines. For convenience, we use the miRNA KO flies to represent the experimental flies in the cross schemes.

(A) Experimental procedures for measuring mating success and ability to repress female re-mating.

(B) Experimental procedures for assessing male viability and meiotic drive.
