# Supplementary material for: Death of new microRNA genes in Drosophila via gradual loss of fitness advantages
Source: HighWire-hosted journal article supplement (doi:10.1101/gr.233809.117), 2018-07-26
Supplement: Supplemental_Fig.S8.pdf [file Supplemental_Fig.S8.pdf]

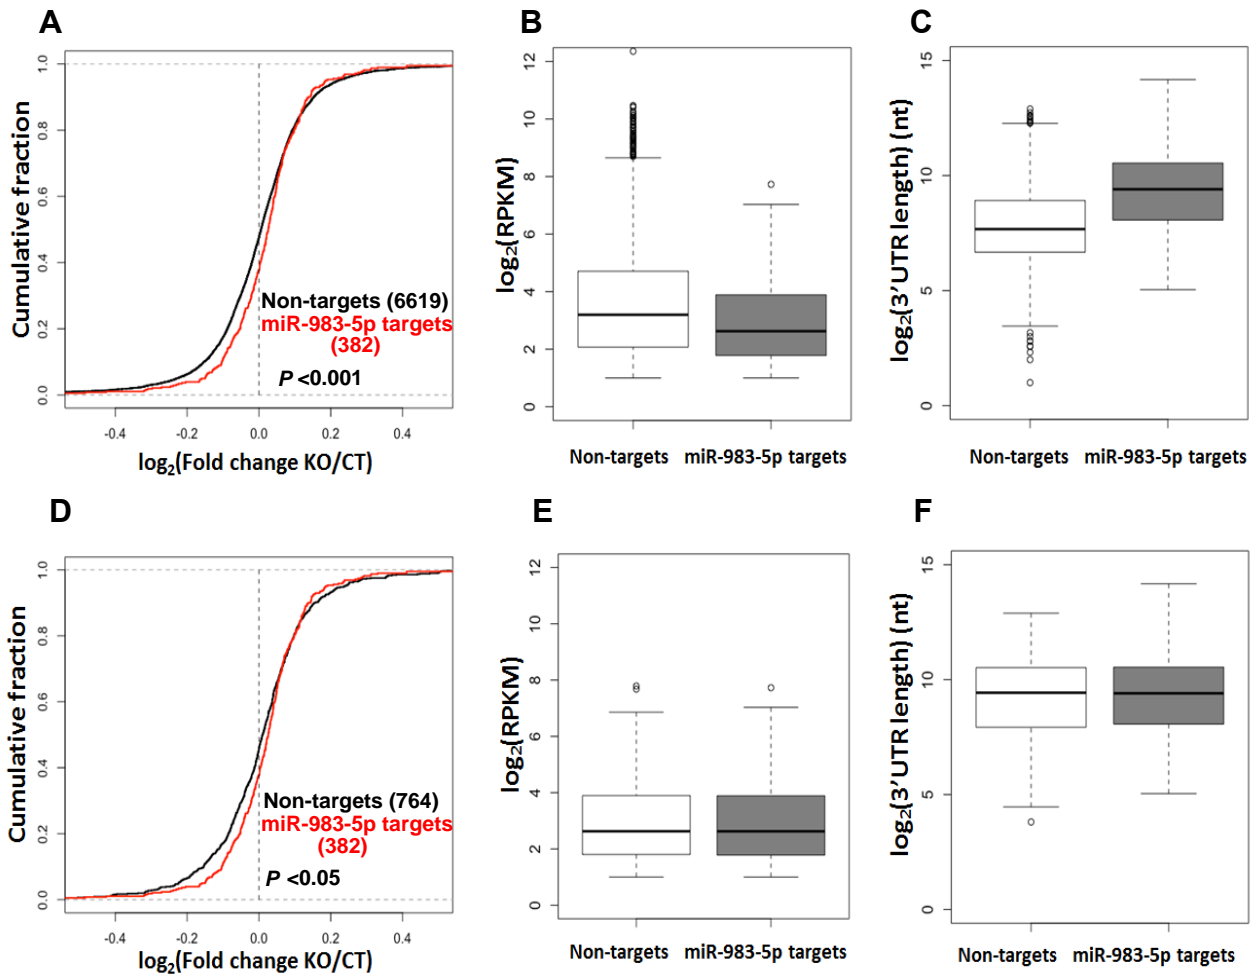

**Fig S8. Re-analysis of *mir-983* target repression with refining background control.**

(A-C) Original design, non-targets set is the gene pool containing all expressed genes without miR-983-5p targets. (D-F) Re-analysis of *mir-983* target repression, non-targets set is refined with the same expression and 3'UTR length distribution.

(A) *mir-983* target repression. Targets of *mir-983* (miR-983-5p) are significantly up-regulated compared to non-targets in the *mir-983* KO line ( $P < 0.001$ , Kolmogorov-Smirnov test).

(B-C)Expression and 3'UTR length distribution for both non-targets and miR-983-5p targets.

(D) Re-analysis of mir-983 target repression. Targets of *mir-983* are significantly up-regulated compared to the refined non-targets in the *mir-983* KO line ( $P < 0.05$ , Kolmogorov-Smirnov test).

(E-F)Expression and 3'UTR length distribution for both refined non-targets and miR-983-5p targets. No difference shown is significant (Kolmogorov-Smirnov test, overall  $P > 0.1$ ).
