# Supplementary material for: Death of new microRNA genes in Drosophila via gradual loss of fitness advantages
Source: HighWire-hosted journal article supplement (doi:10.1101/gr.233809.117), 2018-07-26
Supplement: Supplemental_TableS4.pdf [file Supplemental_TableS4.pdf]

**TableS4. Viability of miRNA KO lines.**

| Measurements<br>in wild type males | Relative fitness of miRNA knock out males vs. wild type males |                |                |                |                |                |                |
|------------------------------------|---------------------------------------------------------------|----------------|----------------|----------------|----------------|----------------|----------------|
|                                    | Wild type<br>(Control)                                        | <i>mir-973</i> | <i>mir-975</i> | <i>mir-977</i> | <i>mir-978</i> | <i>mir-983</i> | <i>mir-984</i> |
| <b>Male viability</b>              |                                                               |                |                |                |                |                |                |
| 1.07±0.04                          | 1                                                             | 1.04           | 1.07           | 1.10           | 1.29*          | 1.21*          | 1.20*          |
| <b>Female viability</b>            |                                                               |                |                |                |                |                |                |
| 1.12±0.06                          | 1                                                             | 1.00           | 1.02           | 0.98           | 0.95           | 0.94           | 0.91           |

Note: Male viability data is also presented in Table 1, relative fitness estimates are presented in materials and methods. (\*)  $P<0.05$ .
