# Supplementary figures and images for: Death of new microRNA genes in Drosophila via gradual loss of fitness advantages
Source: HighWire-hosted journal article supplement (doi:10.1101/gr.233809.117), 2018-07-26

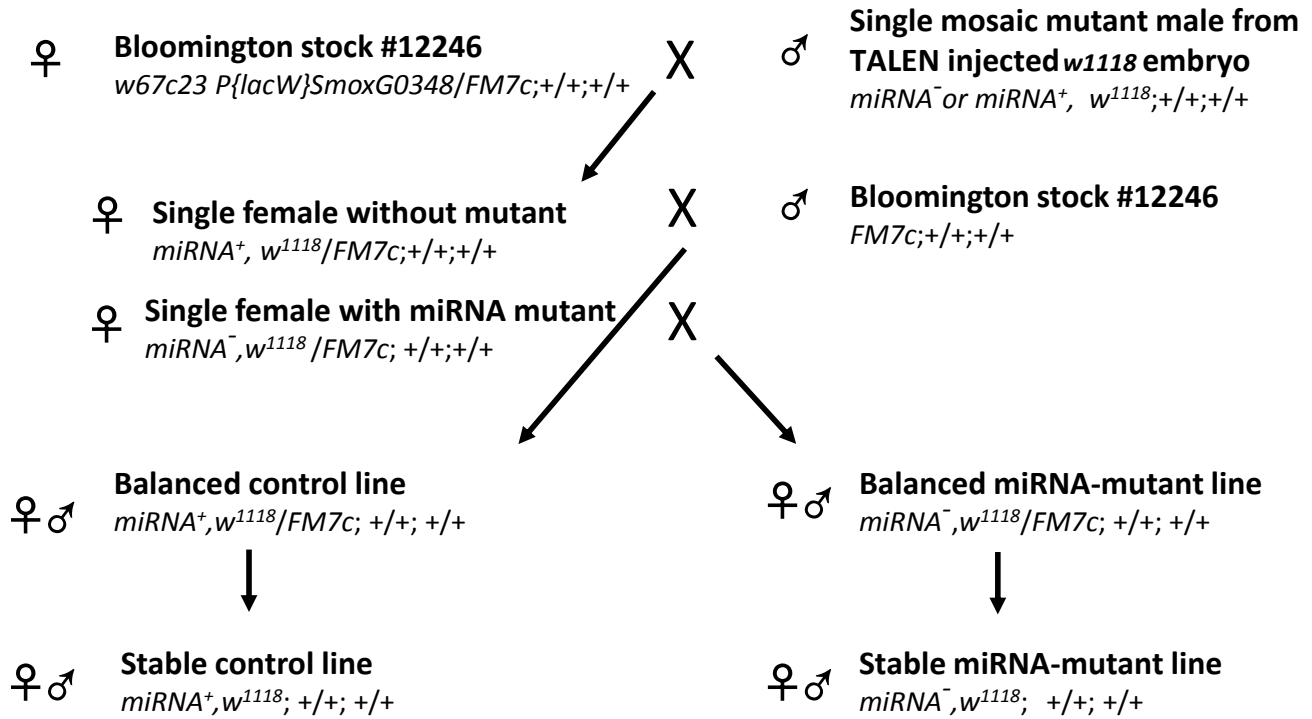

**Fig. S2. Cross scheme for miRNA mutant generation.**

Supplement: Supplemental_Fig.S2.pdf [file Supplemental_Fig.S2.pdf]
